# Supplementary material
Source: publisher site journal article supplement (https://www.dovepress.com/article/506609)
Supplement: Supplementary file 1 [file get_supplementary_file.php]

Appendix 1: Investigation Form

**Homemade questionnaire**

To facilitate the collection of data, this questionnaire does not involve sensitive or private information.

1. Fill in the number of the appraisal opinion (file name) [fill in the blanks for the question] *

_________________________________

2. Identification year [Single choice] *

| ○2017 |
| --- |
| ○2018 |
| ○2019 |
| ○2020 |
| ○2021 |
| ○ Other _________________ |

3. Household registration?[single choice]*

| ○ city |
| --- |
| ○ province outside the city |
| ○ outside the province |

4. Where was happened?[single choice]*

| ○ city |
| --- |
| ○ province outside the city |
| ○ outside the province |

5. Entrusted matters?[multiple choice]*

| □ Identification of criminal responsibility capacity |
| --- |
| □ Prison ability appraisal |
| □ Disability Identification |
| □ Sexual defense ability identification |
| □ Accept compulsory isolation and detoxification ability appraisal |
| □ Correlation degree between trauma and traffic accidents |
| □ Ability to stand trial appraisal |
| □ Compulsory medical capacity |
| □ Other _________________* |

6. Cause of case?[gap filling]

_________________________________

7. Mental examination [Single choice] *

| ○ Abnormal _________________ |
| --- |
| ○ No abnormal _________________ |

8. Sex [Multiple choice choice] *

| ○ man | ○ woman |  |  |  |  |  |  |
| --- | --- | --- | --- | --- | --- | --- | --- |

9. Birth year [fill in the blank question]

_________________________________

10. Education [Multiple choice] *

| ○ Elementary School and below |
| --- |
| ○ junior high school / technical secondary school |
| ○ High School / High School |
| ○ University / Junior College |
| ○ postgraduate |
| Dr. ○ and above |
| ○ not quite clear |

11. Marital status [Multiple choice] *

| ○ Unmarried _________________ |
| --- |
| ○ married |
| ○ dissociaton |
| ○ remarry |
| ○ bereft of one's spouse |
| ○ not quite clear |

12. Work condition [Single choice] *

| ○ in work |
| --- |
| ○ has no job |
| ○ Other _________________ |

13. Parent status [Multiple choice]

| ○ married |
| --- |
| ○ dissociaton |
| ○ Unknown _________________ |
| ○ separated |
| ○ remarry |

14. Number of siblings [single choice]

| ○ only |
| --- |
| ○1 |
| ○2 |
| ○3 |
| ○ 4 and more _________________ |
| ○ not quite clear |

15. Natural birth?[single choice]

| ○ yes |
| --- |
| ○ deny |
| ○ not quite clear |

16. Family psychiatric history [single choice]

| ○ not quite clear |
| --- |
| ○ There is a _________________ |
| ○ not have |

17. History of psychoactive substances?[multiple choice]*

| □ Drug use (traditional) _________________ |
| --- |
| □ Drug use (new) _________________ |
| □ ethyl alcohol |
| □ cigarette |
| □ not have |

18. Do you have a criminal record?[single choice]

| ○ yes |
| --- |
| ○ deny |
| ○ not quite clear |

Relying on question 5 # 1; 2; 5; 7; 8; 9 options

19. Motivation [Multiple choice]

| ○ Random initiation-realistic motivation |
| --- |
| ○ Deliberate-realistic motivation |
| ○ pathological motive |
| ○ Hybrid Motivation |
| ○ Other _________________ |

Depends on option 1 of question 5

20. Is there a history of somatic diseases?[single choice]

| ○ Is the _________________ |
| --- |
| ○ deny |
| ○ not quite clear |

21. Is there a history of mental illness?[single choice]

| ○ Is the _________________ |
| --- |
| ○ deny |
| ○ not quite clear |

22. History of trauma [single choice]

| ○ not have |
| --- |
| ○ Brain trauma, _________________ |
| ○ Other _________________ |

23. Is there a history of mental illness treatment?[single choice]

| ○ not have |
| --- |
| ○ section for outpatients |
| ○ be in hospital |
| ○ Other _________________ |

Depends on option 1 in question 21

24. Criminal ability / sexual defense energy scale?(Value) [Fill in the blanks]

_________________________________

Depends on option # 5, item # 1; option # 4

25. Level of criminal responsibility / defense capability?[single choice]

| ○ whole |
| --- |
| ○ place restrictions on |
| ○ not have |

Depends on option # 5, item # 1; option # 4

26. Number of identification times?[single choice]*

| ○ 1 (please skip to question 29) |
| --- |
| ○2 |
| ○ 3 and above |

27. Are the multiple tests in the same institution?[single choice]*

| ○ yes |
| --- |
| ○ deny |

28. Who proposes a reappraisal?[single choice]*

| ○ judicial authority |
| --- |
| ○ family members |
| ○ self |
| ○ insurer |
| ○ party injured |
| ○ Other _________________ |

29. Disability Level [Multiple choice]

| ○ ten |
| --- |
| ○ nine |
| ○ eight |
| ○ seven |
| ○ six |
| ○ five |
| ○ four |
| ○ three |
| ○ two |
| ○ one |
| ○ does not constitute disability |

Depends on option 3 in question 5

30. Engagement rating scale for mental injury?[gap filling]

_________________________________

Depends on option 3 in question 5

31. IQ IQ [Fill in the blanks]

_________________________________

Relying on question 5,1; 3; 4; 6 options

32. Diagnosis [Single-choice] *

| ○ Organic mental disorder _________________ |
| --- |
| ○ Mental disorders caused by psychoactive substances or non-addictive substances _________________ |
| ○ _________________ in schizophrenia |
| ○ Mood disorders, _________________ |
| ○ Hysteria, stress-related disorder _________________ |
| ○ Psychological factors related to physiological disorders _________________ |
| ○ Personality disorder _________________ |
| ○ Mental retardation _________________ |
| ○ Children and adolescent disorders _________________ |
| ○ No psychotic _________________ |
| ○ Other _________________ |

33. Diagnosis (replication) [Fill in the blanks]

_________________________________

34. Conclusion [blank-filling questions]

_________________________________
